# Supplementary material for: Estrogen Abolishes the Repression Role of gga-miR-221-5p Targeting ELOVL6 and SQLE to Promote Lipid Synthesis in Chicken Liver
Source: PubMed Central journal article supplement (PMC7084605; doi:10.3390/ijms21051624), 2020-02-27
Supplement: ijms-21-01624-s001.pdf [file ijms-21-01624-s001.pdf]

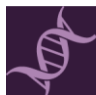

Article

# Estrogen Abolishes the Repression Role of gga-miR-221-5p Targeting *ELOVL6* and *SQLE* to Promote Lipid Synthesis in Chicken Liver

Ding-Ding Zhang<sup>1</sup>, Dan-Dan Wang<sup>1</sup>, Zhang Wang<sup>1</sup>, Yang-Bin Wang<sup>1,2,3</sup>, Guo-Xi Li<sup>1,2,3</sup>, Gui-Rong Sun<sup>1,2,3</sup>, Ya-Dong Tian<sup>1,2,3</sup>, Rui-Li Han<sup>1,2,3</sup>, Zhuan-Jian Li<sup>1,2,3</sup>, Rui-Rui Jiang<sup>1,2,3</sup>, Xiao-Jun Liu<sup>1,2,3</sup>, Xiang-Tao Kang<sup>1,2,3</sup>, Hong Li<sup>1,2,3\*</sup>

<sup>1</sup> College of Animal Science and Veterinary Medicine, Henan Agricultural University, Zhengzhou 450002, China; 15736702905@163.com (D.-D.Z.); wdd13938406174@163.com (D.-D.W.); wangzh19930124@163.com (Z.W.); ybwang2008@henau.edu.cn (Y.-B.W.); liguoxi0914@henau.edu.cn (G.-X.L.); grsun2000@126.com (G.-R.S.); ydtian111@163.com (Y.-D.T.); rlhan@henau.edu.cn (R.-L.H.); lizhuanjian@henau.edu.cn (Z.-J.L.); jrrcaas@163.com (R.-R.J.); xiaojun.liu@henau.edu.cn (X.-J.L.); xtkang2001@263.net (X.-T.K.); lihong19871202@163.com (H.L.)

<sup>2</sup> Henan Innovative Engineering Research Center of Poultry, Zhengzhou 450002, China

<sup>3</sup> International Joint Research Laboratory for Poultry Breeding of Henan, Zhengzhou, 450002, China.

\* Correspondence: lihong19871202@163.com (H. L)

Received: 3 January 2020; Accepted: 24 February 2020; Published: date

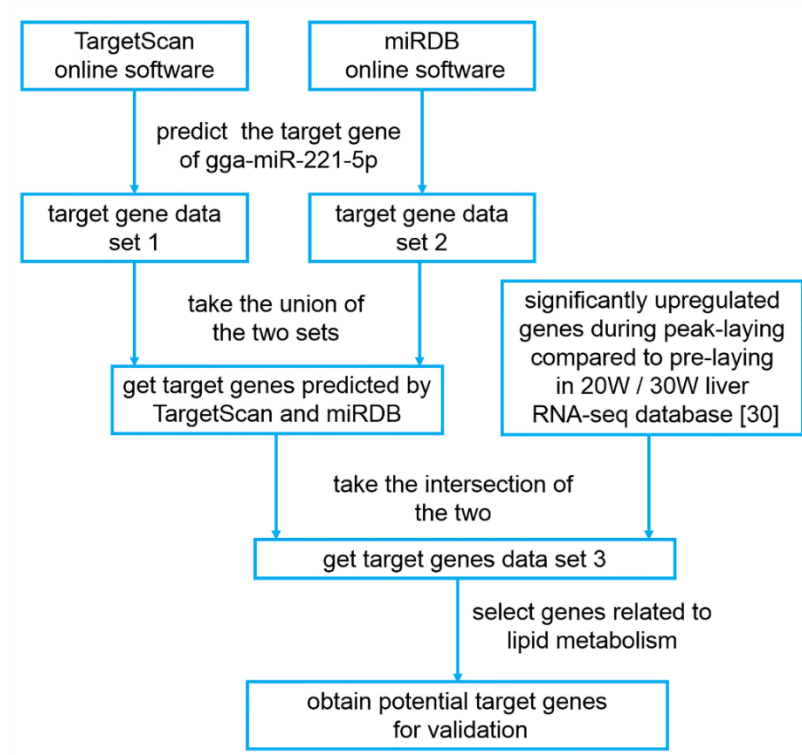

**Supplementary Figure S1.** Flow chart of gga-miR-221-5p target gene screening.
